# Supplementary material for: A CRISPR screen identifies MAPK7 as a target for combination with MEK inhibition in KRAS mutant NSCLC
Source: PLoS One. 2018 Jun 18;13(6):e0199264. doi: 10.1371/journal.pone.0199264 (PMC6005515; doi:10.1371/journal.pone.0199264)
Supplement: S4 Table — (XLSX) [file pone.0199264.s004.xlsx]

## Sheet: Sheet1
gRNA name	gRNA 19 mer sequence	vector
NTC_1	TGATCATCTTTGATCAGAA
NTC_13	CCGCACCTGTTTAGCAGCA
NTC_17	TCGTTGCCCTCCGACTGAG
NTC_25	CACGCACACGTGTGCCGCG
PLK1_a	GGGAAGCTGGCACGGGCAC
PLK1_b	ACGGGCACCGGCCGACCCT
PLK1_c	CGGCTTTCCCAGGGTCGGC
PLK1_d	GCTCCGGGAGCTGCAACTC
PTPN11_a	GTTTCATGGACATCTCTCT
PTPN11_b	TTGTTCTTTCTGTGCGCAC
PTPN11_e	CGCTGGGCACGCCGTGGTC
PTPN11_g	AGGGTCGCTGGGCACGCCG
KRAS_a	TGAATTAGCTGTATCGTCA
KRAS_b	TGGATATTCTCGACACAGC
KRAS_c	CTCGACACAGCAGGTCAAG
KRAS_d	AGAGGAGTACAGTGCAATG
BRAF_a	GGCCAGGCTCTGTTCAACG
BRAF_c	GCAGGGTCCGCAGCCGAAG
BRAF_e	GCGGACCCTGCCATTCCGG
BRAF_f	CAAATGATTAAGTTGACAC
RAF1_d	GCAGTTTGGCTATCAGCGC
RAF1_e	AGCGCCGGGCATCAGATGA
RAF1_g	TGCCTTATGAAAGCACTCA
RAF1_h	TATGAAAGCACTCAAGGTG
MARCH5_b	TGAATGGGTGAGACCATGC
MARCH5_c	CCAGGCCTGTCTACAACGC
MARCH5_e	GCCTGTCTACAACGCTGGG
MARCH5_f	TCCACCCAGCGTTGTAGAC
CNOT4_b	GTGGAGTGCCCTCTTTGCA
CNOT4_e	TGATATCATCTATCTCCAA
CNOT4_f	CTGGTAGCCACAGGTGCAA
CNOT4_g	CGGCAAATCTGGTAGCCAC
CHUK_b	AGCCGCTCCCGCATCTCCC
CHUK_d	TGCGGGAGCGGCTGGGCAC
CHUK_f	CAGACGTTCCCGAAGCCGC
CHUK_g	CGTCTGTCTGTACCAGCAT
MAP2K4_c	CCGGCCGTCAGCAGCATGC
MAP2K4_f	GGATTTGGATGTAGTAATG
MAP2K4_g	ATATTCTTCTGGACAGAAG
MAP2K4_h	CAGCCAGCATCTCTTGTCT
MAPK7_d	TCCTGTACCAACTGCTGCG
MAPK7_e	GGCCTGAAGTACATGCACT
MAPK7_g	AAGTACATGCACTCGGCTC
MAPK7_h	GGAGGGCTTCAGGTCACGG
MAP2K7_c	GGAGAACCGGGAGGCCCGG
MAP2K7_d	GTTGAGGTCGATCCTCCGC
MAP2K7_f	GTTGGCCAGCGGGAGCTGC
MAP2K7_g	CTCCCGCTGGCCAACGATG
MCL1_b	TTTGTGTCCTTGGCGCCGG
MCL1_d	CCAAGGACACAAAGCCAAT
MCL1_h	TCCAGCGCCTTCCTGCTGG
MCL1_l	GTGCAGCGCAACCACGAGA
UBE2H_b	GCCAATAACTGAGGCAGGA
UBE2H_c	ATAGGCCAATAACTGAGGC
UBE2H_d	TAGGATAGGCCAATAACTG
UBE2H_e	CTGCAGCGTCACCATTGAG
UBE2J2_c	TGATCATATAGATACTGGG
UBE2J2_d	GGAGTGATCATATAGATAC
UBE2J2_e	CTATATGATCACTCCCAAC
UBE2J2_g	TTGCACTTAAACCTCCCGT
SOCS3_d	CTTGGAGCTGAAGGTCTTG
SOCS3_f	TCCAAGAGCGAGTACCAGC
SOCS3_g	AAGAGCGAGTACCAGCTGG
SOCS3_h	ACCAGCTGGTACTCGCTCT
JAK1_d	GAAGTGATCTTCTATCTGT
JAK1_f	TCTCCACTGCCCAGCCGGA
JAK1_g	GTACTCTCCACTGCCCAGC
JAK1_h	AGTGGAGAGTACACAGCAG
DUSP4_e	GGAAGGGAAGGATCTCCAC
DUSP4_f	CACTGCCGAGGTAGAGGAA
DUSP4_g	GTAGGCACTGCCGAGGTAG
DUSP4_h	AGCATGGTAGGCACTGCCG
ROCK2_a	GCGAGCCGCCAGAGGAAGC
ROCK2_d	AAGCTCTCCACGTTGATGG
ROCK2_f	ATCAGAGGTCTACAGATGA
ROCK2_g	CGTCACAAGGCATCGCAGA
TADA1_c	AGAACTTAAGCGAGGCCCT
TADA1_d	CTGGGCTAACCTAAAGCTG
TADA1_e	AAGCAGAAGATCAGCAAAG
TADA1_g	GCTCATAGACTTCTCACAC
PAK2_a	TGCTGCTCATTCGCACAGG
PAK2_c	GTAATCGAGCCCACTGTTC
PAK2_f	ACTGACGTTGCACTGGGAC
PAK2_h	TGGTCATGGAATACCTTGC
NF1_a	GAAGCGGCTGACCACGGCC
NF1_b	TCGTCGAAGCGGCTGACCA
NF1_e	TTGATTATATTGGATACAC
NF1_i	TTGTTACAGTATATCAATG
PLK1_e	GCAGCTCCCGGAGCTCCGG	pLKO_SHC201_gRNA_GNE
hPLK1_2	GTTGTCCTCGAAAAAGCCG	pLKO_SHC201_gRNA_GNE
hPLK1_BE1	GCCGGCGGCGCTATGTGCG	pLKO_SHC201_gRNA_GNE
hPLK1_BE2	AATCCTACGACGTGCTGGT	pLKO_SHC201_gRNA_GNE
NTC_29	GCACACATACACACGCTTA	pLKO_SHC201_gRNA_GNE
NTC_37	CGCTGGCCAAGCACGGAAT	pLKO_SHC201_gRNA_GNE
NTC_38	AAATCCATCACTTCGCACC	pLKO_SHC201_gRNA_GNE
NTC_8	TAGTGTAAATGAGTCTCTA	pLKO_SHC201_gRNA_GNE
